1 **Sniffing behaviour of Barbary macaques at Affenberg Salem**

2 Miriam Simon<sup>1</sup>, Anja Widdig<sup>2,3</sup> & Brigitte M. Weiß<sup>2,3\*</sup>

3

4 <sup>1</sup> Institute of Organismic and Molecular Evolution, Gutenberg University, Hanns-Dieter-  
5 Hüsch-Weg 15, 55128 Mainz, Germany

6 <sup>2</sup> Behavioural Ecology Research Group, Faculty of Life Sciences, University of Leipzig,  
7 Talstraße 33, 04103 Leipzig, Germany

8 <sup>3</sup> Research Group Primate Behavioural Ecology, Department of Human Behavior, Ecology and  
9 Culture, Max Planck Institute for Evolutionary Anthropology, Deutscher Platz 6, 04103  
10 Leipzig, Germany

11

12 \* corresponding author: [brigitte.schloegl@uni-leipzig.de](mailto:brigitte.schloegl@uni-leipzig.de)

13

14

## 15     **Abstract**

16             Olfaction is one of the evolutionarily oldest senses and plays a fundamental role in  
17     foraging as well as social interactions across mammals. In primates, however, its role has  
18     long been underappreciated, leading to a scarcity of studies on the role of olfaction for  
19     primate lives, particularly in Old World monkeys and apes. We therefore observed the  
20     sniffing behaviour of semi-free ranging Barbary macaques, *Macaca sylvanus*, at Affenberg  
21     Salem, Germany, to assess how frequently macaques use olfaction in which contexts, and  
22     how sniffing behaviour is affected by individual attributes such as sex and age. Focal  
23     observations of 24 males and 24 females aged 1 to 25 years showed that Barbary macaques  
24     sniffed, on average, 5.3 times per hour, with more than 80% of sniffs directed at edible  
25     items. Irrespective of the context, younger individuals used olfaction more often than older  
26     ones. Females sniffed more often at edible items than males did, while males used olfaction  
27     more often in a social context than females did. Sniffs at conspecifics primarily occurred in a  
28     sexual context, with 70% of social sniffs directed at female anogenital swellings. Of the 176  
29     anogenital inspections recorded during focal follows and ad libitum, 51 involved sniffing the  
30     swelling. Notably, olfactory inspections of anogenital swellings were followed by a  
31     copulation significantly less often than merely visual inspections, suggesting that anogenital  
32     odours provided additional information guiding male mating decisions. In sum, results show  
33     that Barbary macaques routinely use olfaction during foraging, but also in a social context.  
34     Our study further suggests that odours may guide mating decision, but the role of olfaction  
35     in Barbary macaque sexual interactions warrants further investigations.

## 36 Introduction

37 Animals use various sensory modalities to gain information about their social and  
38 physical environment. Olfaction, the sense of smell, is one of the evolutionarily oldest senses  
39 and represents an important pathway of information transfer that is used in fundamental  
40 behaviours such as foraging (e.g. Short-nosed fruit bats, *Cynopterus sphinx*, Zhang et al.,  
41 2014), predator avoidance (e.g. black-tailed deer, *Odocoileus hemionus*, Chamaillé-Jammes  
42 et al., 2014) or mating (e.g. Harvest mice, *Micromys minutus*, Robert & Gosling, 2004).

43 In primates, optic convergence and stereoscopic vision represent significant parts of  
44 their evolution, accompanied by a relative shrinking of the olfactory apparatus (Kay, 2018).  
45 Thus, it was long assumed that olfaction is of little relevance in taxa with advanced visual  
46 capabilities, resulting in a paucity of olfactory studies in many primate taxa. Many  
47 strepsirrhine primates are nocturnal and possess bigger-sized main and accessory olfactory  
48 bulbs and less specialized vision than other primate taxa (Barton, 2006). Accordingly, the  
49 role of olfaction in their ecology and social lives has been studied more intensely than in  
50 other taxa. It is well-established that odour plays an important role in their sociality by  
51 providing information about attributes such as sex, age or territory (e.g. Janda et al., 2019)  
52 as well as in their foraging behaviour (e.g. Cunningham et al., 2021). However, it has become  
53 increasingly evident that also diurnal primates may rely strongly on olfaction in a range of  
54 contexts. In New World monkeys, studies in several species have shown that they actively  
55 use olfaction in foraging situations, and that the use of olfaction is modulated by the  
56 available visual information. White-faced capuchins (*Cebus capucinus*) and spider monkeys  
57 (*Ateles geoffroyi*), for instance, were observed to sniff more on fruits that give only vague  
58 visual cues about their ripeness (Nevo & Heymann, 2015; Hiramatsu et al., 2009). Moreover,  
59 olfaction also plays a role in the sociality of New World monkey species. For instance,  
60 anogenital odour of female common marmosets (*Callithrix jacchus*) was shown to vary with  
61 fertile stage, and males inspected peri-ovulatory odours more intensely than odour samples  
62 from other fertile stages (Kücklich et al., 2019).

63 Catarrhine primates (Old World monkeys and apes) show trichromatic vision in both  
64 sexes along with a missing or non-functional vomeronasal organ, only half the number of  
65 olfactory receptor genes and relatively smaller olfactory bulbs compared to strepsirrhine  
66 primates (Niimura et al., 2018). In this group, the assumption of "microsmatic" primates has  
67 persisted the longest. However, a more recent viewpoint suggests that neuroanatomical

features like the number of olfactory genes are not always synonymous with olfactory sensitivity (Laska & Galizia, 2001; Laska et al., 2007). Furthermore, the importance of proportionally smaller olfactory bulbs has been questioned, since the mere proportional correlation of body size to organ size and, therefore, function may not apply in olfactory systems (Smith & Bhatnagar, 2004). In addition, the traditionally assumed separation of the main and the accessory olfactory system appears to be vaguer than previously thought (Sipos et al., 1995; Petrulis et al., 1999). Hence, it is not surprising that research has also started to focus on the involvement of olfaction in catarrhine sociality and ecology (e.g. Matsumoto-Oda et al., 2007; Poirotte et al., 2017; Vaglio et al., 2021). For instance, rhesus macaques (*Macaca mulatta*) as well as chimpanzees (*Pan troglodytes*) were shown to differentiate between group and non-group members when presented with samples of body odour (Henkel et al., 2015; Henkel & Setchell, 2018). In mandrills (*Mandrillus sphinx*), group members infected with parasites were discovered to have a different faecal odour than non-infected members, whereby healthy individuals avoided the faecal matter of infected conspecifics and avoided grooming them (Poirotte et al., 2017). Both in the wild and in captivity, chimpanzees were observed to sniff at food as well as at conspecifics. While females used olfaction to inspect food more than males did, males were observed to sniff more in a social and sexual context than females, which was attributed to their fission-fusion society and the high level of male competition (Matsumoto-Oda et al., 2007; Jänig et al., 2018). Hence, evidence is accumulating that also catarrhine primates rely on olfaction in a range of contexts, but the number of studies and species investigated remains low, thereby hampering a more general understanding of the role of olfaction in catarrhine lives.

To contribute to closing the knowledge gap regarding olfaction in catarrhine species, the present study investigated the natural sniffing behaviour of Barbary macaques (*Macaca sylvanus*), an Old World monkey native to northern Africa and Southern Europe. Their diet consists of various plants and their different parts such as seeds, leaves or bark, as well as insects such as grasshoppers or butterflies (Fooden, 2007). Like many other catarrhine species, Barbary macaques live in multi-male, multi-female groups and show a promiscuous mating system (Modolo & Martin, 2007). They are sexually active year-round, but show increased sexual behaviour during the mating season in autumn in winter. Offspring are born in spring and early summer (Paul & Kuester, 1992). Females are philopatric, while males often disperse from the natal group around puberty (Kuester & Paul, 1999). Females show a

conspicuous visual fertility signal, the anogenital swelling, which is directly linked to estrogen levels and reaches its maximum size during the most fertile phase (Brauch et al., 2007). Nonetheless, observations of genital inspections by looking, sniffing and touching, as well as mating behaviour suggest that males may have more than visual information available to determine female fertility (Young et al., 2013).

Hence, we aimed to investigate the use of olfaction (i.e. sniffing behaviour) in Barbary macaques in different contexts (feeding, social and non-social), and to examine possible variation in the use of olfaction related to sex and age. Similar to results in chimpanzees, we hypothesized that male Barbary macaques sniff more in the social context than females. On the other hand, we expected females to sniff more at edible items, as females are energetically more constrained than males. With regard to age, we expected younger Barbary macaques to sniff more frequently than older individuals irrespective of the context. Infants and juveniles are in a process of learning about their environment and conspecifics surrounding them. Hence, olfaction could be used more often to explore and gain experience in all contexts, as observed e.g. in great apes (Jänig et al., 2018). We also assessed the role of olfaction in inspection behaviour of the female sexual swelling. In particular, we expected olfactory inspections to be more prevalent in younger, more inexperienced males and towards older females, whose fertility status may be uncertain to the respective male.

## Methods

### Study site

The study was conducted at Affenberg Salem close to Lake Constance, Germany, which is home to ~ 200 Barbary macaques living in 20 hectares of fenced forest year-round under near-natural conditions. The park is open to visitors from March to November. Visitors are restricted to a path in ~ one third of the enclosure, while the monkeys can roam freely across the entire area (see de Turckheim & Merz 1984 for details on the park). The monkeys feed on food found throughout the park and receive daily supplements of fruits and vegetables. Furthermore, wheat is distributed widely on and around the feeding grounds. Water is accessible at several ponds and water troughs ad libitum. The park is home to three naturally formed social groups, each consisting of 50-70 individuals of both sexes and all age classes. All monkeys are individually identifiable by tattoos and natural markings. To control

population size, about two thirds of the adult females receive hormonal implants (Implanon NXT).

### Behavioural observations

Observations of sniffing behaviour were conducted between 17.10.2020 and 06.12.2020, and thus, from the onset of the mating season to its peak (Fooden, 2007). We observed 48 focal animals from two of the three groups. Focal animals comprised 24 females and 24 males from ages 1 to 25 and thus covered all age classes, from juveniles (up to 2.5 years of age, N = 6) and subadults (up to 4.5 years of age, N = 9) to adults (5 years and older, N = 33, supplementary table S1). Out of the 24 females observed, 13 had contraception implanted. Each focal animal was observed six times á 20 minutes over the study period. Out of the six observations per focal animal, three were conducted in a feeding context (defined as at least ten minutes of feeding per protocol) and three were recorded in a non-feeding context. During the focal protocols all instances of sniffing as well as details about the targets of sniffing were recorded. Observations were randomly distributed between the available daylight hours from 08:00 am to 05:00 pm.

All observations were recorded with a digital video camera (Panasonic HC-V180). If the recorded subject moved out of sight during filming, the video was either discarded or, in 11 instances, two shorter videos were counted as one. Sniffs were scored from the videos using the recorded video image as well as commentaries verbally recorded onto the video during the focal observations. A sniff was defined as the individual bringing its nose at least 3 cm or closer towards an object or touching an object with the hand and then bringing the hand towards the nose (Zschoke & Thompson, 2014). Each sniff recorded in the videos was assigned to one of three target categories: food, social (sniffs directed at a conspecific or its excretions) or other (sniffs directed at the environment, human-made objects and self-sniffs) following Jänig et al. (2018). For each observed sniff, the target object was specified and analysed and the behaviour of the monkey after the sniff was noted. All videos were analysed by one observer (MS), however, five percent of the data were sighted by an additional observer trained by MS to check for inter-observer reliability. The audio-track of the video was unavailable to the second coder to avoid bias. By comparing the respective observed sniffs, the intraclass correlation coefficient (ICC) was calculated and revealed good reliability (ICC=0.86; Koo & Li, 2016). Besides the video protocols, ad libitum data were

collected for every sniff that was observed outside the focal observations for focal and non-focal animals. Furthermore, whenever inspections of female swellings by males were observed, the following data were noted ad libitum: male and female ID, group, date, time, whether visual and/or olfactory inspection occurred and which inspection happened first, and if inspection was followed by a copulation.

## Statistical Analysis

Statistical analysis was conducted in R version 4.0.3 (R core team 2020) using Generalized Linear Mixed Models (GLMM) to allow accounting for repeated observations of the same individuals (Bates et al., 2015). We conducted three sets of models that were fitted by using the function “glmer” from the package “lme4” version 1.1-26 (Bates et al., 2015).

### *Sniffing frequencies*

The aim of the first model was to investigate the influence of sex, age and context on sniffing frequencies. Accordingly, the number of sniffs per 20min focal observation and target category was used as the response variable, fitted with a Poisson error distribution ( $N = 288 \text{ observations} \times 3 \text{ target categories} = 864$ ). Sex, birth year, context and target were fitted as fixed effects test predictors. Context referred to the observational context ‘feeding’ or ‘non-feeding’ in which each protocol was recorded. Target categorized for each sniff whether it was directed at ‘food’, ‘social’ or ‘other’ (as defined above). Group, daytime and Julian day were fitted as fixed effects control predictors. Daytime was coded as morning (until 12:30 pm) or afternoon (after 12:30pm). Julian Day was included to control for the progress of the mating season. Several two-way interactions were included in the model: I) sex and target to address the hypothesis that males sniff more in a social context and females more in a feeding context; II) sex and Julian day, since the observational period started at the early beginning of the mating season and ended at its height. Male and female sniffing behaviour could therefore show different patterns from the beginning to the end of the observation period; III) context and target, because the contexts ‘feeding’ or ‘non-feeding’ presumably influence the probable targets of sniffing; IV) birth year and target, to account for the possibility that age affects which objects the monkeys sniff at, and V) daytime and target, as fresh food got distributed every morning at 08:00 and we accordingly expected more sniffs at edible items in the morning than in the afternoon. ID was included

as a random effects control predictor. To achieve more reliable p-values (Barr et al., 2013), we fitted random slopes of all predictors showing sufficient variation within ID, i.e. the random slopes of Julian day, context\*target, and daytime\*target.

### *Olfactory inspection of females*

The aim of the second model was to investigate the influence of female and male characteristics and the progression of the mating season on whether male inspections of female sexual swellings included olfaction or not (N = 176 genital inspections). For this purpose, we fitted a GLMM with binominal error distribution using all genital inspections observed during focal observations as well as those recorded ad libitum. Female and male birth year, whether or not the female was contracepted and Julian day were fitted as fixed effects test predictors, while daytime and group were included as fixed effects control predictors. The two-way interaction of female birthyear and male birthyear was included to account for the possibility that an effect of male age on olfactory inspection could be modulated by the age of the male's partner. Female and male ID were included as random effects control predictors. For the random effect of male ID, the random slopes of Julian day, female birth year and contraception were incorporated. For female ID, the random slopes of Julian day and male birth year were included.

### *Genital inspections and copulation*

Using focal and ad libitum data, a third GLMM was fitted with binominal error distribution to investigate the influence of female and male characteristics and the occurrence of olfactory inspection on whether or not a genital inspection was followed by a copulation (N = 176 genital inspections). Female and male birth year, contraception (yes/no) and olfactory inspection (yes/no) were fitted as fixed effects test predictors while daytime, group and Julian day were included as fixed effects control predictors. We initially incorporated four two-way interactions: I) female birth year and male birth year; II) female birth year and olfactory inspection; III) Julian day and olfactory inspection and IV) contraception and olfactory inspection. However, the interaction terms were too imbalanced, which caused stability issues (see general model procedures for stability checks), and were therefore removed again from the model. After removing the interactions, the model showed no stability issues. Female and male subject were included



as random effects control predictors. For the random effect of male ID, Julian day, olfactory inspection, contraception and female birth year were included as random slopes. For female ID, Julian day, olfactory inspection and male birth year were included as random slopes.

### *General Model Procedures*

For all models, covariates were z-transformed to a mean of zero and a standard deviation of one before running the models to facilitate interpretation of model coefficients and model convergence (Schielzeth, 2010). Variance Inflation Factors (VIF) were computed using the function ‘vif’ of the package ‘car’ (Fox & Weisberg, 2019) to check for collinearity between the predictors (Quinn & Keough, 2002). With largest VIFs of 1.08 (model 1), 1.3 (model 2) and 1.1 (model 3), no collinearity issue could be detected in either model. All three models were tested for over- and underdispersion, with resulting dispersion parameters of 0.59 (model 1), 0.91 (model 2), and 0.62 (model 3). As the first and the third model were moderately underdispersed, the computed p-values should be considered conservative. Model stabilities were assessed by excluding levels of random effects one at a time. With the exception of model 3 when fitted with interactions, none of the models showed stability issues. A Likelihood Ratio Test (LRT) was used to determine the effects of the test predictors on the response variables by comparing a null model without fixed effects test predictors to the respective full model containing all predictor (Dobson, 2002; Forstmeier & Schielzeth, 2011). If the full-null model comparison was significant ( $p < 0.05$ ) or a trend ( $p < 0.1$ ), the p-values of the individual predictors were afterwards determined by using the function “drop1” from the package “lme4” version 1.1-26 (Bates et al., 2015). To facilitate interpretation of the main terms, non-significant interactions were removed from the models.

### **Results**

In total, 511 sniffs were observed across all focal observations (96 hours total observation time), with  $1.78 \pm 1.70$  (mean  $\pm$  SD) sniffs per individual per 20 min observation period (corresponding to 5.34 sniffs per hour). Females were observed to sniff a total of 314 times (mean  $\pm$  SD:  $2.18 \pm 2.9$  per individual and observation period) and males 197 times (mean  $\pm$  SD:  $1.37 \pm 1.81$  per individual and observation period, see Tab. 1). With 83% of sniffs the vast majority of sniffs observed during focal observations was

directed at food items (423/511), while 8% (40/511) and 9% (47/511) were directed at social or other targets, respectively (Tab. 1).

Table 1: Number of sniffs observed at different targets for 48 focal animals in 96 hours of focal observations.

|               | Food       | Social    | Other     | Sum        |
|---------------|------------|-----------|-----------|------------|
| <b>Male</b>   | 150        | 29        | 18        | <b>197</b> |
| <b>Female</b> | 274        | 11        | 29        | <b>314</b> |
| <b>Sum</b>    | <b>423</b> | <b>40</b> | <b>47</b> | <b>511</b> |

49 different identifiable edible items (see supplementary table S2) were observed to be olfactorily inspected by the monkeys. When the target was a conspecific, 70% (28/40) of sniffs were directed at a female swelling (26 by adult males, 2 by adult females). Eleven of the social sniffs were directed at an infant (1 by an adult male, 7 by adult females and 3 by another infant). One sniff was directed at the bottom of a juvenile male by a five-year old male. Of the 47 sniffs at 'other' targets, 27 were self-sniffs, almost exclusively directed at their own hand after scratching themselves, 14 were directed at the environment (e.g. tree branch or ground) and 6 at human-made objects (e.g. bottle cap, camera trap).

In addition, 136 sniffs were observed ad libitum, of which 70 were directed at food, 44 at conspecifics and 22 at other targets, with distributions across sex and age classes similar to data recorded during focal observations. Sniffs observed ad libitum included 18 cases of infants sniffing at their mother's, or in one case their grandmother's, mouth while these were eating.

### Sniffing frequencies

The suite of test predictors had a significant effect on the number of sniffs per individual per observation (LRT,  $\chi^2 = 111.8$ ,  $df = 12$ ,  $P < 0.001$ ). Sniffing frequencies differed between the sexes, whereby the effect of sex depended on the target of the sniff. In particular, more sniffs were observed for females at food and 'other' targets compared to males. Males, on the other hand, sniffed slightly more often at social targets than females (see Tab. 1 & 2, Fig. 1). Furthermore, younger individuals sniffed significantly more often than older individuals (Tab. 2, Fig. 2).

Table 2: Results of the GLMM investigating sniffing frequency (number of sniffs) per focal animal, observation period and target category as response variable with Poisson error distribution. Values in parenthesis indicate trait levels relative to the respective reference level. Values for the non-significant interactions (daytime\*target, context\*target and birth year\*target) represent values before removal of the respective terms from the model. SE = standard error.  $\chi^2$  and P values are derived from Likelihood Ratio Tests to determine the significance of the individual test predictors.

| term                                  | Estimate | SE    | $\chi^2$ | P      |
|---------------------------------------|----------|-------|----------|--------|
| Intercept                             | -0.042   | 0.259 | *        | *      |
| context (non-feeding)                 | -1.255   | 0.204 | 31.479   | <0.001 |
| group (2)                             | 0.111    | 0.268 | 0.159    | 0.690  |
| sex (male)                            | -0.368   | 0.267 | *        | *      |
| Julian day                            | -0.308   | 0.097 | 9.103    | 0.003  |
| daytime (morning)                     | 0.862    | 0.164 | *        | *      |
| target (other)                        | -2.630   | 0.568 | *        | *      |
| target (social)                       | -3.545   | 0.591 | *        | *      |
| birth year                            | 0.297    | 0.137 | 4.502    | 0.034  |
| target*sex                            |          |       | 7.368    | 0.025  |
| target (other)*sex (male)             | 0.159    | 0.785 |          |        |
| target (social)*sex (male)            | 1.780    | 0.678 |          |        |
| daytime*target                        |          |       | 15.085   | <0.001 |
| daytime(morning)*target (other)       | -2.592   | 0.775 |          |        |
| daytime(morning)*target (social)      | -0.994   | 0.455 |          |        |
| context*target                        |          |       | 2.480    | 0.289  |
| context (non-feeding)*target (other)  | 1.342    | 0.765 |          |        |
| context (non-feeding)*target (social) | -0.739   | 0.703 |          |        |
| birth year*target                     |          |       | 0.602    | 0.740  |
| birth year*target (other)             | 0.193    | 0.346 |          |        |
| birth year*target (social)            | 0.25     | 0.402 |          |        |
| sex (male)*Julian day                 | -0.193   | 0.198 | -0.974   | 0.329  |

\* not presented because of having a very limited interpretation

Of the control predictors, context, Julian day and the interaction between daytime and target significantly affected sniffing frequencies (see Tab. 2). In particular, we observed more sniffs during feeding than during non-feeding focal follows, earlier in the season, and at food items more frequently in the morning than in the afternoon. None of the other predictors had a significant influence on sniffing frequencies (Tab. 2).

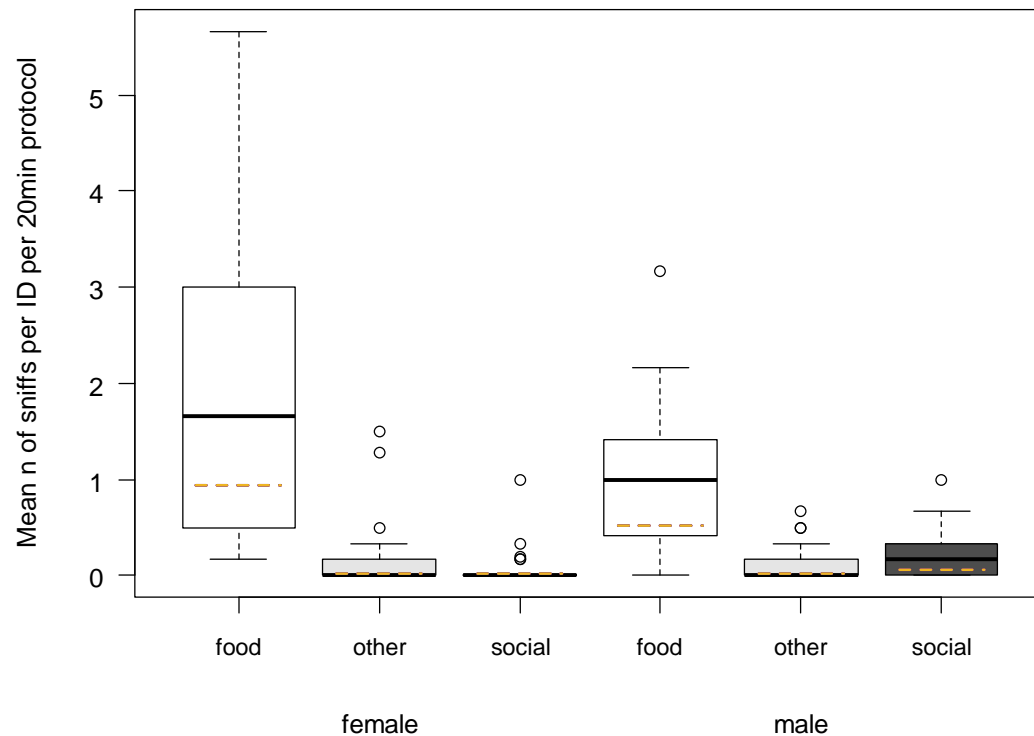

Figure 1: Mean number of sniffs per individual per 20 min focal observation for both sexes divided into the target contexts food, other and social. Boxes represent medians and first and third quartiles. The dashed lines represent the model estimates when all other predictors are at their average.

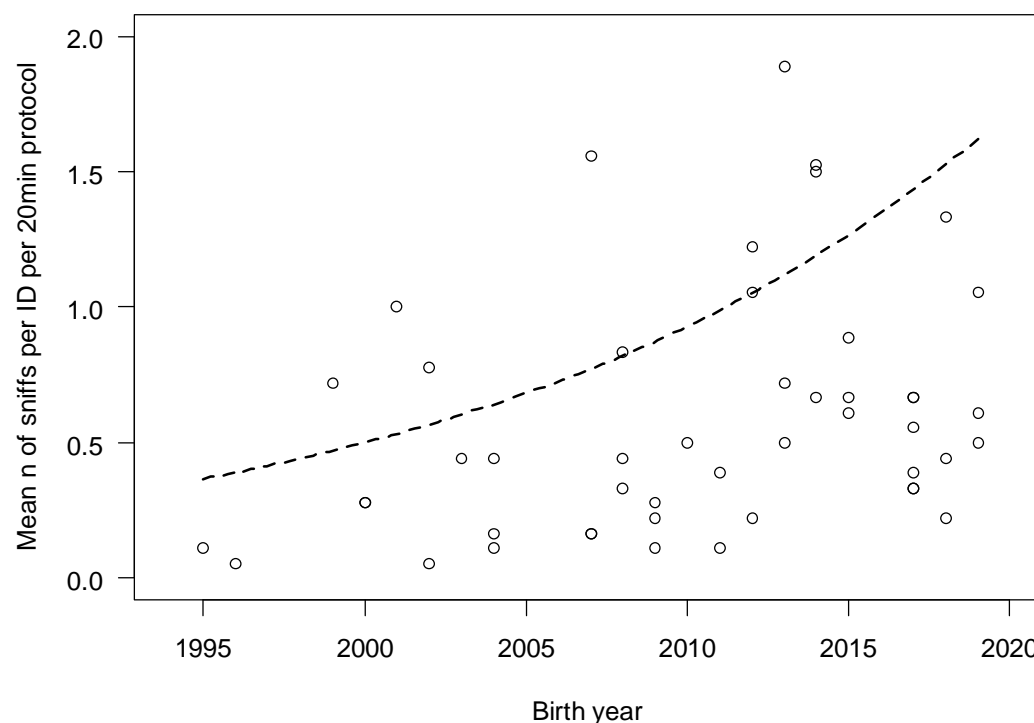

Figure 2: Mean number of sniffs per individual per 20 min focal observation across birth years. The dashed lines represent the model estimate when all other predictors are at their average.

### Olfactory inspection of females

Data on male inspections of sexual swellings, collected ad libitum as well as from the recorded observations, showed that out of 176 observed visual inspections, 51 were accompanied by an olfactory inspection of the swelling. The full-null comparison of the model investigating which parameters affected the occurrence of olfactory inspections revealed only a weak trend (LRT,  $\chi^2 = 16.111$ ,  $df = 10$ ,  $P = 0.09$ ). Solely the interaction between female and male birth year significantly influenced the probability of an olfactory inspection (Tab. 3).

Table 3: Results of the binomial GLMM investigating the probability of an olfactory inspection during genital inspections. Values in parenthesis indicate trait levels relative to the respective reference level. SE = standard error.  $\chi^2$  and P values are derived from Likelihood Ratio Tests to determine the significance of the individual test predictors.

|                                   | Estimate | SE    | $\chi^2$ | P     |
|-----------------------------------|----------|-------|----------|-------|
| Julian day                        | -0.176   | 0.217 | 0.571    | 0.450 |
| male birth year                   | 0.648    | 0.290 | *        | *     |
| female birth year                 | -0.421   | 0.224 | *        | *     |
| contraception (yes)               | 0.774    | 0.754 | 1.050    | 0.306 |
| daytime (morning)                 | 0.292    | 0.403 | 0.499    | 0.480 |
| group (2)                         | -0.744   | 0.599 | 1.478    | 0.224 |
| male birth year*female birth year | 0.417    | 0.200 | 4.512    | 0.034 |

\* not presented because of having a very limited interpretation

### Genital inspections and copulation

Whether or not genital inspections were followed by a copulation was significantly affected by the suite of test predictors (model excluding interactions, LRT,  $\chi^2 = 22.142$ ,  $df = 4$ ,  $P < 0.001$ ). In particular, olfactory inspection of the swelling significantly decreased the probability for copulation after inspection (Tab. 4). In fact, only 2 out of the 51 visual *and* olfactory inspections were followed by a copulation, while copulation followed genital inspection in 44 of the 125 solely visual genital inspections. Furthermore, the female birth year also impacted the copulation probability, with copulations more likely after inspections of younger females than older females (Tab. 4).

Table 4: Results of the binomial GLMM investigating the probability of a copulation following a genital inspection. Values in parenthesis indicate trait levels relative to the respective reference level. SE = standard error.  $\chi^2$  and P values are derived from Likelihood Ratio Tests to determine the significance of the individual test predictors.

|                            | Estimate | SE    | $\chi^2$ | P      |
|----------------------------|----------|-------|----------|--------|
| Julian day                 | -0.508   | 0.301 | 2.212    | 0.137  |
| olfactory inspection (yes) | -3.287   | 1.014 | 21.987   | <0.001 |
| male birth year            | 0.101    | 0.291 | 0.111    | 0.739  |
| female birth year          | 0.874    | 0.345 | 5.221    | 0.022  |
| contraception (yes)        | -0.490   | 0.747 | 0.393    | 0.531  |
| daytime (morning)          | -0.492   | 0.466 | 0.919    | 0.338  |

## Discussion

This study significantly contributes to understanding the sniffing behaviour of Barbary macaques and thereby, Old World monkeys in general. In particular, we could show that most sniffs occurred when assessing edible items, with females sniffing more at food than males did. Males used olfaction in the social context more than females did, and sniffing generally decreased with increasing age. With an average of 5.3 sniffs per hour and individual, Barbary macaques sniffed at similar rates as some guenon species (*Cercopithecus diana*, *neglectus* and *hamlyni*) observed in captivity, which were reported to sniff, on average, 6.1 times per hour and individual (Zschoke & Thomson, 2014). In contrast, sniffing rates reported for four species of great apes, also observed in captivity, were considerably lower (0.2 to 0.4 sniffs per hour and individual, Jänig et al., 2018).

In our study, the vast majority of sniffs was directed at food, which parallels findings for great apes (Jänig et al., 2018), guenons (Zschoke & Thomson, 2014), mandrills and olive baboons (Laidre, 2009). Species that depend mostly on fruits and other plant parts as their diet were suggested to steadily rely on olfactory cues to find and identify ripe food (e.g., Nevo & Heymann, 2015), get information about the nutritional value (Dominy et al., 2001), determine food safety and notice possible contamination (Sarabian et al., 2020). Hence, it comes as no surprise that an almost exclusively vegetarian species like the Barbary macaque shows frequent olfactory assessments of edible items. The collected data, however, did not provide suitable information to assess why certain items were sniffed at and others not. While food ripeness can be implied for all produce fed at the park, nutritional value, safety and contamination with, e.g., soil or faeces, are more complicated to assess for an observer. Additionally, in an environment with a regular feeding routine, primates may learn to rely on

food safety and habituate to the produce available, which could lead to a decrease in the importance of olfactory inspection (Laska et al., 2007). Captive squirrel monkeys (*Saimiri sciureus*) and spider monkeys (*Ateles paniscus*) were described to rely mostly on visual cues when assessing familiar food items whereas novel food was more likely to prompt olfactory inspections (Laska et al., 2007). In line with this suggestion, we observed a disproportional number of sniffs at hay and a chestnut, both of which were only rarely available to the monkeys, but whether Barbary macaques really sniffed more frequently at novel or rare food items could not be addressed as we did not systematically collect data on which types of food and other plants were available how often. However, it should be kept in mind that seasonality and varying geographical availability of food sources could potentially lead to a different exhibition of olfactory inspection of food at other times or in other Barbary macaque populations.

#### Influences of sex and age

The significant interaction between sex and age on sniffing probability supports our hypothesis that male Barbary macaques sniff more often in a social context than females do. This imbalance in social sniffs was also observed in other primate species such as chimpanzees (Jänig et al., 2018; Matsumota-Oda et al., 2007) or owl monkeys (*Aotus nancymae*; Spence-Aizenberg, 2017). In chimpanzees, the fission-fusion dynamics of a high-competition multi-male multi-female group were suggested to enhance olfaction in the social context (Jänig et al., 2018; Matsumota-Oda et al., 2007). For Barbary macaques, which also live in multi-male multi-female groups, almost all social sniffs of adult males were observed to be directed at female sexual swellings and only one at another adult male. Olfaction thus may play a role in sexual competition for fertile females by, for example, providing information about the ovarian cycle in addition to the visual signal of swelling size. However, it does not seem that olfaction is important for males to gather direct information about other males. Female Barbary macaques, on the other hand, sniffed more at food than males. This corresponds to observations of female chimpanzees (Matsumota-Oda et al., 2007). Moreover, female primates of various species tend to be more wary of contamination risks for parasites or bacteria through food that is rotten or spoiled with faeces (e.g. Japanese macaques: Sarabian et al., 2015; grey mouse lemurs: Poirotte et al., 2019; long-tailed macaques: Sarabian et al., 2020; mandrills: Poirotte et al., 2019), as evident from more

olfactory assessment of contaminated food, followed by food manipulation (Sarabian et al., 2020). This behaviour was rewarded by lower infection rates of females (Poulin, 1996; Rolff, 2002; Poirotte et al., 2019), suggesting that more visual or olfactory inspections, even though potentially costly, maximize the long-term fitness and therefore reproductive success of females. Similar mechanisms might apply to Barbary macaques, but a systematic analysis of parasite occurrence in both sexes would be needed to assess this possibility.

Also our hypothesis of young individuals sniffing more often than older ones was supported for Barbary macaques. These findings agree with the consensus that young animals inspect their environment more closely than older individuals since they are still in the process of learning to evaluate food, conspecifics or their general environment. Since the decrease of sniffing events with age in Barbary macaques appears to be quite linear, it is likely that it is primarily caused by increased experience and not by a loss of olfactory capability in old age. 18 out of 22 social sniffs that were observed ad libitum for infant monkeys were directed at the feeding mother's, or in one case the grandmother's, mouth. In each case the infants appeared to observe the eating behaviour and tried to inspect the item visually. They were not chased off and the mothers reacted with indifference to the inspection attempt of their infant. This 'muzzle-muzzle' behaviour has been observed in different mammals and may enable the individuals to smell the breath of their conspecifics while they are eating (e.g. mice: Renn, 2004; Norway rats: Noble et al., 2001; mandrill, drills and baboons: Laidre, 2009). In this way they may gather information on which food has been deemed safe and valuable to eat by their conspecific.

#### Olfaction in sexual interactions

Most social sniffs occurred in a sexual context and were directed at the female anogenital swelling. However, not every inspection observed included olfaction. Hence, we tried to assess which circumstances led to an olfactory inspection and whether an olfactory inspection had an influence on the outcome of the sexual interaction. The model on the occurrence of olfactory inspections provided only weak evidence for an effect of individual characteristics affecting the likelihood to sniff at a sexual swelling during inspection, potentially pointing to an interplay of female and male age effects on olfactory inspections. It has to be noted though, that we did not track changes in female swelling size or other



transient individual attributes, and thus could not assess whether the salience of the visual fertility signal affected whether or not males additionally used olfaction to inspect females.

However, if an olfactory inspection of the swelling occurred, this almost exclusively led to no subsequent copulation. This may indicate that, although swelling size closely reflects female ovarian function (Brauch et al., 2007; Tschoner, 2015), an olfactory cue may provide additional information that deters males from engaging in costly mating behaviour. This may particularly be the case for older females in which an inspection – whether or not it involved olfaction – resulted in fewer copulations than in younger females. It would have been interesting to assess whether female age and olfactory inspection interacted in their effects on copulation probabilities but unfortunately the very low number of olfactory inspections that did lead to copulation did not allow us to address this. The same applies to a potential effect of hormonal contraception. Our results provide no indication that female contraception affected either the likelihood of males to sniff at the swelling or the likelihood of a copulation after inspection, but again we were not able to test whether an effect of olfactory inspection on copulatory behaviour may have differed between contracepted and non-contracepted females. More detailed observations on, e.g., whether a copulation was ejaculatory or not, or if males later returned to inspect and/or copulate with the respective female may help to better understand the role of olfaction in Barbary macaque mating interactions. This, however, would require more systematic focal observations of sexual interactions that were beyond the scope of this study. Thus, our analyses should be seen as a starting point for further research on olfaction in sexual interactions.

In conclusion, Barbary macaques routinely used olfaction in different contexts and its use was modulated by individual attributes such as sex and age. These findings are in line with current research in other (catarrhine) primates and the growing evidence about the importance of olfaction across primate species. Subsequent research is needed to thoroughly interpret sniffing behaviour at food or conspecifics in the light of visual or other available sensory information, with this study functioning as a basis and offering starting points for future studies. As such, this study represents a first step towards understanding the use and importance of olfaction in the lives of Barbary macaques, and thereby contributes to a better understanding of the role of olfaction for primates in general.

## Acknowledgements

We are highly grateful to R. & M. Hilgartner and the team at Affenberg Salem for permission to conduct the study, provisioning of demographic information and their continuing support throughout the study. We are also thankful to A. Krüger for coding videos for the assessment of interobserver reliability.

## Funding

This study was funded by the German Research Foundation, DFG (grant no. SCHL 2011/2-1 awarded to B.M. Weiß).

## Ethics statement

This study was purely observational and in accordance with the legal requirements of Germany, all national and institutional guidelines for the care and use of animals.

## Conflict of Interest

The authors declare that they have no conflict of interest.

## References

- Barr DJ, Levy R, Scheepers C, Tily HJ. 2013. Random effects structure for confirmatory hypothesis testing: keep it maximal. *J Mem Lang* 68: 255–278.
- Barton RA. 2001. Olfactory evolution and behavioral ecology in primates. *Am J Primatol*. 68(6): 545-58.
- Bates B, Maechler M, Bolker B, Walker S. 2015. Fitting Linear Mixed-Effects Models Using lme4. *Journal of Statistical Software*. 67: 1-48.
- Brauch K, Pfefferle D, Hodges K, Mohle U, Fischer J, Heistermann M. 2007. Female Sexual Behavior and Sexual Swelling Size as Potential Cues for Males to Discern the Female Fertile Phase in Free-ranging Barbary macaques (*Macaca sylvanus*) of Gibraltar. *Hormones and Behavior*. 52 (3): 375–83.
- Cunningham EP, Edmonds D, Stalter L, Janal MN. 2021. Ring-tailed lemurs (*Lemur catta*) use olfaction to locate distant fruit. *Am J Phys Anthropol*. 175(1): 300-307.

489 Dobson AJ. 2002. An introduction to generalized linear models (2nd ed.). Boca Raton: CRC  
490 Press.

491 Fisher R. 1955. Statistical Methods and Scientific Induction. Journal of the Royal Statistical  
492 Society. Series B (Methodological). 17(1): 69–78.

493 Fooden J. 2007. Systematic review of the Barbary macaque, *Macaca sylvanus* (Linnaeus,  
494 1758). New series No. 113. Chicago: Field Museum of Natural History.

495 Forstmeier W, Schielzeth H. 2011. Cryptic multiple hypotheses testing in linear models:  
496 Overestimated effect sizes and the winner's curse. Behavioral Ecology and Sociobiology.  
497 65(1): 47–55.

498 Fox J, Weisberg S. 2019. An {R} Companion to Applied Regression, Third Edition. Thousand  
499 Oaks CA: Sage. URL: <https://socialsciences.mcmaster.ca/jfox/Books/Companion/>

500 Henkel S, Setchell JM. 2018. Group and kin recognition via olfactory cues in chimpanzees  
501 (*Pan troglodytes*). Proceedings of the Royal Society B: Biological Sciences. 285: 1889.

502 Hiramatsu C, Melin AD, Aureli F, Schaffner CM, Vorobyev M, Kawamura S. 2009. Interplay of  
503 olfaction and vision in fruit foraging of spider monkeys, Animal Behaviour, Volume 77, Issue  
504 6: 1421-1426.

505 Janda ED, Perry KL, Hankinson E, Walker D, Vaglio S. 2019. Sex differences in scent-marking  
506 in captive red-ruffed lemurs. Am J Primatol. 81(1): e22951.

507 Jänig S, Weiß BM, Widdig A. 2018. Comparing the sniffing behavior of great apes. Am J  
508 Primatol. e22872.

509 Kay RF. 2018. 100 years of primate paleontology. American Journal of Physical Anthropology.  
510 165(4): 652–676.

511 Kücklich M, Weiß B.M, Birkemeyer C, et al. 2019. Chemical cues of female fertility states in a  
512 non-human primate. Sci Rep. 9: 13716

513 Kuester J, Paul A. 1992. Influence of male competition and female mate choice on male  
514 mating success in Barbary macaques (*Macaca sylvanus*). Behaviour. 120: 192–217.

515 Kuester J, Paul A. 1999. Male Migration in Barbary Macaques (*Macaca sylvanus*) at Affenberg  
516 Salem. International Journal of Primatology. 20: 85–106.

517 Koo T, Li M. 2016. A Guideline of Selecting and Reporting Intraclass Correlation Coefficients  
518 for Reliability Research. J Chiropr Med. 15(2): 155-163.

519 Laidre ME. 2009. Informative breath: olfactory cues sought during social foraging among Old  
520 World monkeys (*Mandrillus sphinx*, *M. Leucophaeus*, and *Papio anubis*). Journal of  
521 Comparative Psychology. 123(1): 34-44.

522 Laska M. and Galizia CG. 2001. Enantioselectivity of odor perception in honeybees. Behav.  
523 Neurosci. 115: 632-639.

524 Laska M, Bautista RM, Höfelmann D, Sterlemann V, Hernandez Salazar LT. 2007. Olfactory  
525 sensitivity for putrefaction-associated thiols and indols in three species of non-human  
526 primate. J Exp Biol; 210 (23): 4169–4178.

527 Laska M, Freist P, Krause S. 2007. Which senses play a role in nonhuman primate food  
528 selection? A comparison between squirrel monkeys and spider monkeys. Am J Primatol.  
529 69(3): 282-94.

530 Matsumoto-Oda A, Kutsukake N, Hosaka K, Matsusaka T. 2007. Sniffing behaviors in Mahale  
531 chimpanzees. Primates, 48(1): 81–85.

532 Modolo L, Martin RD. 2007. Reproductive success in relation to dominance rank in the  
533 absence of prime-age males in Barbary macaques. American Journal of Primatology. 70(1):  
534 26–34.

535 Nevo O, Heymann EW. 2015. Led by the nose: Olfaction in primate feeding ecology. Evol.  
536 Anthropol. 24: 137-148.

537 Niimura Y, Matsui A, Touhara K. 2018. Acceleration of Olfactory Receptor Gene Loss in  
538 Primate Evolution: Possible Link to Anatomical Change in Sensory Systems and Dietary  
539 Transition, Molecular Biology and Evolution. 5 (6): 1437–1450.

540 Noble J, Todd PM, Tuci E. 2001. Explaining social learning of food preferences without  
541 aversions: an evolutionary simulation model of Norway rats. Proc Biol Sci. 268(1463):141-9.

542 Petrulis A, Peng M, Johnston RE. 1999. Effects of vomeronasal organ removal on individual  
543 odor discrimination, sex-odor preference, and scent marking by female hamsters. Physiol.  
544 Behav. 66: 73–83.

545 Pfefferle D, Brauch K, Heistermann M, Hodges K, Fischer J. 2008. Female Barbary macaque  
546 (*Macaca sylvanus*) copulation calls do not reveal the fertile phase but influence mating  
547 outcome Proc. R. Soc. B.275: 571–578.

548 Poirotte C, Massol F, Herbert A, Willaume E, Bomo PM, Kappeler PM, Charpentier MJE. 2017.  
549 Mandrills use olfaction to socially avoid parasitized conspecifics. Science Advances. 3(4).

550 Poirotte C, Sarabian C, Ngoubangoye B, MacIntosh AJJ, Charpentier M. 2019. Faecal  
551 avoidance differs between the sexes but not with nematode infection risk in mandrills. Anim.  
552 Behav. 149: 97-106.

553 Poulin R. 1996. Sexual inequalities in helminth infections: a cost of being a male? Am. Nat.  
554 147: 287-295.

555 Quinn GP, Keough M J. 2002. Experimental Designs and Data Analysis for Biologists.  
556 Cambridge University Press, Cambridge.

557 R Core Team 2020. R: A language and environment for statistical computing. R Foundation  
558 for Statistical Computing, Vienna, Austria. <https://www.R-project.org/>.

559 Rolff J. 2002. Bateman's principle and immunity. Proc. R. Soc. Lond. B.269: 867–872.

560 Sarabian C, MacIntosh A. 2015. Hygienic tendencies correlate with low geohelminth  
561 infection in free-ranging macaques. Biol. Lett.11: 20150757.

562 Sarabian C, Ngoubangoye B, MacIntosh A. 2020. Divergent strategies in faeces avoidance  
563 between two cercopithecoid primates R. Soc. open sci.7191861191861

564 Schielzeth H. 2010. Simple means to improve the interpretability of regression coefficients.  
565 Methods in Ecology and Evolution. 1: 103-113.

566 Smith TD, Bhatnagar KP. 2004. Microsmatic primates: reconsidering how and when size  
567 matters. Anat Rec B New Anat. 279(1): 24-31.

568 Sipos ML, Wysocki CJ, Nyby JG, Wysocki L, Nemura TA. 1995. An ephemeral pheromone of  
569 female house mice: perception via the main and accessory olfactory systems. Physiol. Behav.  
570 58: 529–534.

571 Spence-Aizenberg AM. 2017. Olfactory Communication, Mate Choice, And Reproduction In A  
572 Pair Bonded Primate (*aotus Spp.*). Publicly Accessible Penn Dissertations. 2885.

573 Tschoner SE. 2015. Sexual swelling as honest signal for fertility in female Barbary macaques  
574 (*Macaca sylvanus*)? Universität Wien. Fakultät für Lebenswissenschaften.

575 Zschoke A, Thomsen R. 2014. Sniffing behaviours in guenons. In: Folia primatologica;  
576 international journal of primatology. 85 (4): 244-251.

577

578

579 Table S1: Overview observed sniffs for all 48 focal animals. For each monkey, the total number of  
580 sniffs that was observed during the six focal observations as well as a breakdown of the sniffs that  
581 occurred in the context food, social or other are listed. Additionally, the respective birthyear, sex and  
582 group are noted. All females marked with an asterisk were contracepted during the study period.  
583

| Birthyear | ID  | Sex     | Group | Sniffs Total | Food | Social | Other |
|-----------|-----|---------|-------|--------------|------|--------|-------|
| 1995      | M1  | Male    | 1     | 2            | 2    | 0      | 0     |
| 1996      | F1  | Female  | 1     | 1            | 1    | 0      | 0     |
| 1999      | M2  | Male    | 2     | 13           | 13   | 0      | 0     |
| 2000      | M3  | Male    | 2     | 5            | 4    | 1      | 0     |
| 2000      | F2  | Female  | 2     | 5            | 5    | 0      | 0     |
| 2001      | F3  | Female* | 2     | 18           | 18   | 0      | 0     |
| 2002      | F4  | Female* | 2     | 14           | 12   | 0      | 2     |
| 2002      | F5  | Female* | 1     | 1            | 1    | 0      | 0     |
| 2003      | F6  | Female* | 2     | 8            | 8    | 0      | 0     |
| 2004      | M4  | Male    | 2     | 3            | 1    | 0      | 2     |
| 2004      | M5  | Male    | 1     | 2            | 1    | 0      | 1     |
| 2004      | M6  | Male    | 1     | 8            | 8    | 0      | 0     |
| 2007      | M7  | Male    | 1     | 3            | 3    | 0      | 0     |
| 2007      | F7  | Female* | 2     | 28           | 28   | 0      | 0     |
| 2007      | F8  | Female* | 2     | 3            | 2    | 0      | 1     |
| 2008      | M8  | Male    | 2     | 6            | 5    | 1      | 0     |
| 2008      | M9  | Male    | 2     | 8            | 0    | 6      | 2     |
| 2008      | F9  | Female* | 1     | 15           | 12   | 2      | 1     |
| 2009      | M10 | Male    | 1     | 2            | 2    | 0      | 0     |
| 2009      | F10 | Female* | 2     | 4            | 4    | 0      | 0     |
| 2009      | F11 | Female* | 1     | 5            | 4    | 1      | 0     |
| 2010      | M11 | Male    | 1     | 9            | 7    | 2      | 0     |
| 2011      | M12 | Male    | 2     | 7            | 6    | 0      | 1     |
| 2011      | F12 | Female  | 1     | 2            | 2    | 0      | 0     |
| 2012      | M13 | Male    | 2     | 4            | 3    | 1      | 0     |
| 2012      | F13 | Female* | 2     | 19           | 18   | 0      | 1     |

|      |     |         |   |    |    |   |   |
|------|-----|---------|---|----|----|---|---|
| 2012 | M14 | Male    | 1 | 22 | 19 | 3 | 0 |
| 2013 | M15 | Male    | 2 | 9  | 9  | 0 | 0 |
| 2013 | M16 | Male    | 2 | 13 | 13 | 0 | 0 |
| 2013 | F14 | Female* | 2 | 34 | 34 | 0 | 0 |
| 2014 | M17 | Male    | 1 | 12 | 7  | 4 | 1 |
| 2014 | F15 | Female* | 1 | 27 | 21 | 6 | 0 |
| 2014 | F16 | Female  | 1 | 32 | 23 | 0 | 9 |
| 2015 | M18 | Male    | 2 | 11 | 10 | 1 | 0 |
| 2015 | F17 | Female* | 2 | 12 | 12 | 0 | 0 |
| 2015 | F18 | Female  | 1 | 16 | 16 | 0 | 0 |
| 2017 | M19 | Male    | 2 | 10 | 5  | 2 | 3 |
| 2017 | M20 | Male    | 1 | 12 | 11 | 1 | 0 |
| 2017 | M21 | Male    | 1 | 7  | 6  | 1 | 0 |
| 2017 | F19 | Female  | 2 | 12 | 2  | 1 | 9 |
| 2017 | F20 | Female  | 2 | 5  | 4  | 1 | 0 |
| 2017 | F21 | Female  | 1 | 6  | 6  | 0 | 0 |
| 2018 | M22 | Male    | 1 | 8  | 2  | 2 | 4 |
| 2018 | F22 | Female  | 2 | 4  | 2  | 0 | 2 |
| 2018 | F23 | Female  | 2 | 24 | 23 | 0 | 1 |
| 2019 | M23 | Male    | 2 | 11 | 6  | 4 | 1 |
| 2019 | M24 | Male    | 1 | 9  | 6  | 0 | 3 |
| 2019 | F24 | Female  | 1 | 19 | 16 | 0 | 3 |

584

585

586

587

588

589

590

591

592



Table S2: Identified edible items focal animals sniffed at and the respective number of observed sniffs. Not included were unidentifiable objects (e.g. stems).

| Item            | No. Sniffs | Item          | No. Sniffs |
|-----------------|------------|---------------|------------|
| Potato          | 30         | Black raddish | 2          |
| Leave           | 26         | Pear          | 2          |
| Carrot          | 23         | Pomegranate   | 2          |
| Pineapple       | 22         | Walnut        | 2          |
| Apple           | 21         | Wheat         | 2          |
| Salad           | 17         | Avocado       | 1          |
| Tomato          | 16         | Beetroot      | 1          |
| Leek            | 15         | Chives        | 1          |
| Grape           | 14         | Clover        | 1          |
| Hay             | 11         | Eggplant      | 1          |
| Popcorn         | 11         | Fern          | 1          |
| Parsley         | 10         | Gras          | 1          |
| Capsicum        | 8          | Pellet        | 1          |
| Escallion       | 8          | Red cabbage   | 1          |
| Beechnut        | 7          | Thyme         | 1          |
| Chestnut        | 7          | Bark          | 1          |
| Stems           | 7          |               |            |
| Celery          | 6          |               |            |
| Orange          | 6          |               |            |
| Seed            | 6          |               |            |
| Tree branch     | 6          |               |            |
| Mushroom        | 5          |               |            |
| Broccoli        | 4          |               |            |
| Cucumber        | 4          |               |            |
| Fennel          | 4          |               |            |
| Mango           | 4          |               |            |
| Basil           | 3          |               |            |
| Brussel sprout  | 3          |               |            |
| Cabbage         | 3          |               |            |
| Chinese cabbage | 3          |               |            |
| Honey melon     | 3          |               |            |
| Vitelotte       | 3          |               |            |
| Banana          | 2          |               |            |
